# Supplementary material
Source: PubMed Central journal article supplement (PMC3105158)
Supplement: NIHMS291525-supplement-1_si_001.pdf [file NIHMS291525-supplement-1_si_001.pdf]

## Drug-eluding microarrays for cell-based screening of chemical-induced apoptosis

Cheong Hoon Kwon<sup>a,b</sup>, Ian Wheeldon<sup>a,b,c</sup>, Nezamoddin N. Kachouie<sup>a,b</sup>, Seung Hwan Lee<sup>a,b</sup>, Hojae Bae<sup>a,b</sup>, Shilpa Sant<sup>a,b,c</sup>, Junji Fukuda<sup>d</sup>, Jeong Won Kang<sup>e,\*</sup> and Ali Khademhosseini<sup>a,b,c,\*</sup>

<sup>a</sup> Center for Biomedical Engineering, Department of Medicine, Brigham and Women's Hospital, Harvard Medical School, Boston, MA 02115

<sup>b</sup> Harvard-MIT Division of Health Sciences and Technology, Massachusetts Institute of Technology, Cambridge, MA 02139

<sup>c</sup> Wyss Institute for Biologically Inspired Engineering, Harvard University, Boston, MA, 02115

<sup>d</sup> Graduate School of Pure and Applied Sciences, University of Tsukuba, Tsukuba, Japan 305-8573

<sup>e</sup> Department of Chemical and Biological Engineering, Korea University, 5-Ga Anam-Dong, Sungbuk-Ku, Seoul, South Korea 136-701

\* Corresponding authors: Ali Khademhosseini, [alik@rics.bwh.harvard.edu](mailto:alik@rics.bwh.harvard.edu), Jeong Won Kang, [jwkang@korea.ac.kr](mailto:jwkang@korea.ac.kr)

### Supporting Information

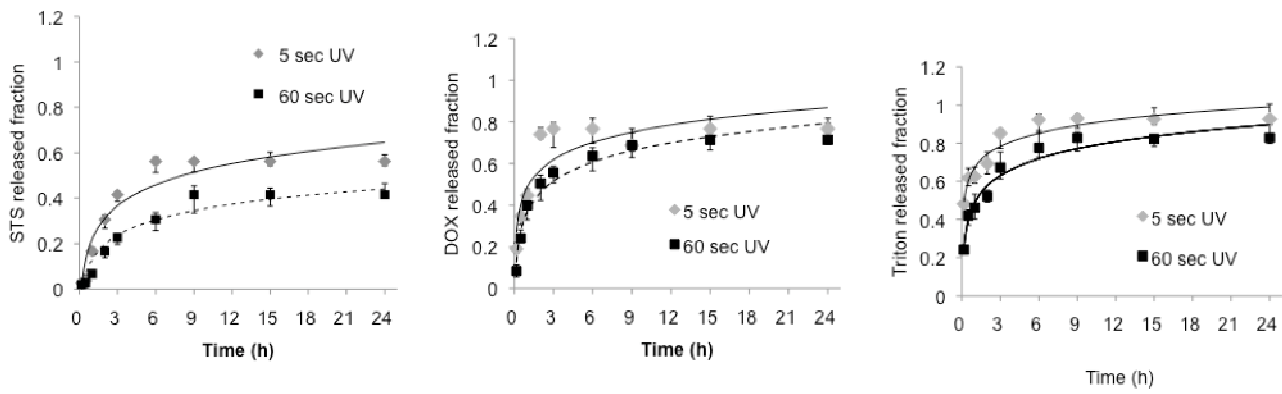

**Figure 1.** Chemical release from PEGDA hydrogels. Release profile of 10  $\mu\text{M}$  STS (A), 10  $\mu\text{M}$  DOX, and 0.1 % Triton X-100 (C), over a 24 hour period with 5 and 60 seconds of UV exposure. The release of each compound was measured from 1  $\mu\text{L}$  gels placed in 100  $\mu\text{L}$  of PBS solution. Chemical release was monitored by UV-Vis spectrometry at 495 nm for doxorubicin, 292 nm for staurosporine, and 280 nm for Triton X-100.

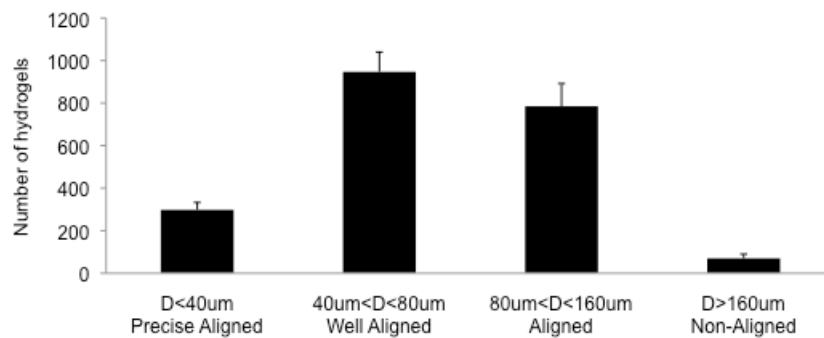

**Figure 2.** Device alignment accuracy. The number of hydrogels with a distance between the center point of the hydrogel and the center of the aligned microwell that is less than 40  $\mu\text{m}$ , between 40 and 80  $\mu\text{m}$ , between 80 and 160  $\mu\text{m}$ , and greater than 160  $\mu\text{m}$ . Hydrogels and microwells are considered

misaligned if the distance between the center of each is greater than 160  $\mu\text{m}$ . The average alignment accuracy is 96.7% (n = 3).

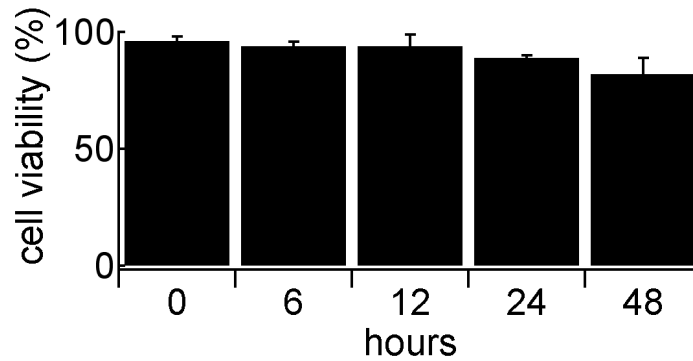

**Figure 3.** HEPG2 viability in sealed microwell cultures.

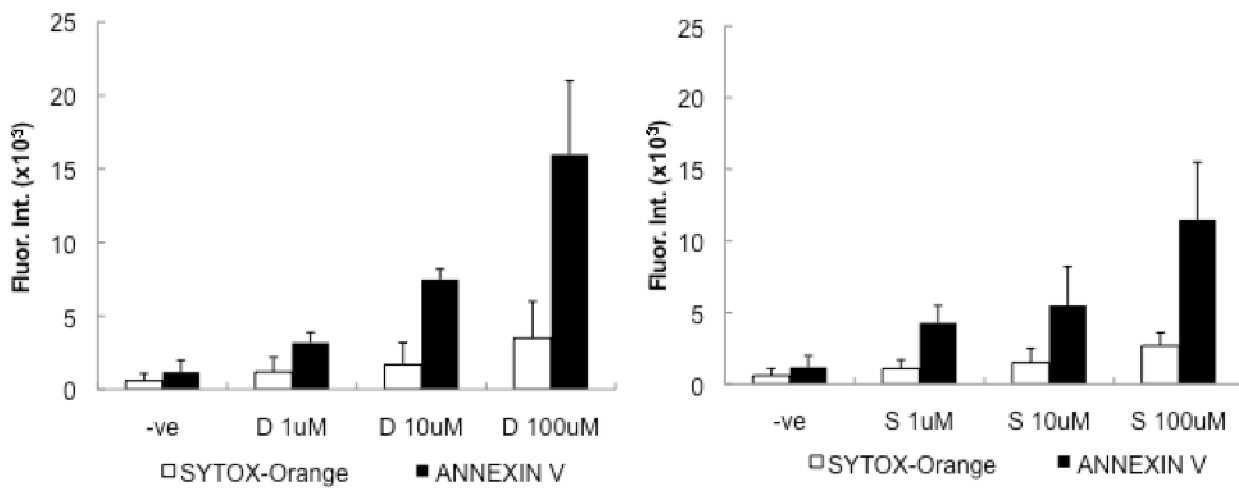

**Figure 4.** DOX and STS apoptotic assays in 96-well plate format. The fluorescence intensity of annexin V-APC and SYTOX Orange of MCF-7 cells exposed to 0, 1, 10 and 100  $\mu\text{M}$  of DOX and STS for 12 hours.

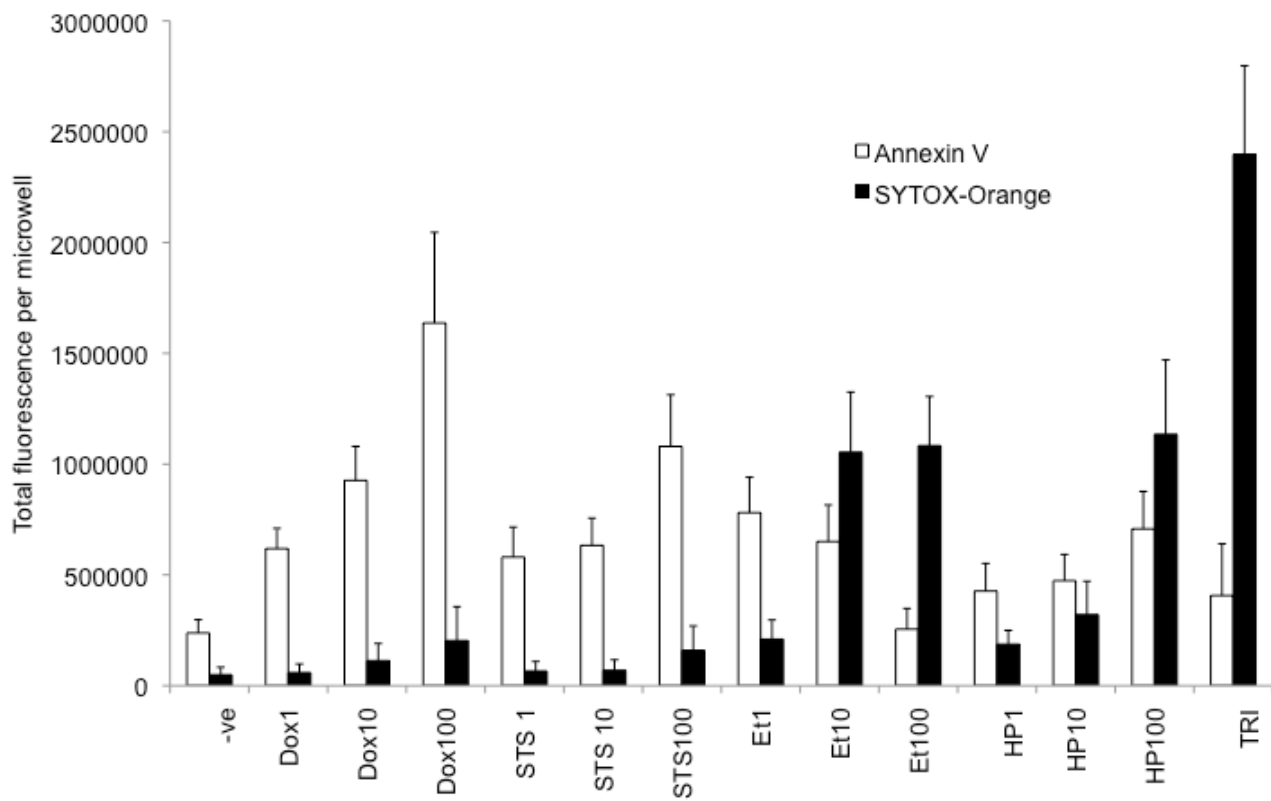

**Figure 5.** Annexin V-APC and STOX Orange fluorescent intensity for DOX, STS, ethanol, and hydrogen peroxide.
